# Supplementary material for: UMOD as a susceptibility gene for end-stage renal disease
Source: PubMed Central journal article supplement (PMC3495046; doi:10.1186/1471-2350-13-78), 2012-09-05
Supplement: 1471-2350-13-78-S1.pdf [file 1471-2350-13-78-S1.pdf]

## Supplementary Material

**Table S1.** Distribution of primary diseases in relation to *UMOD* rs12917707 genotype in ESRD patients.

|                                                                   | <i>UMOD</i> rs12917707 |           |          | P value |
|-------------------------------------------------------------------|------------------------|-----------|----------|---------|
|                                                                   | 0                      | 1         | 2        |         |
| N                                                                 | 799                    | 310       | 33       |         |
| Glomerulonephritis, n (%)                                         | 168 (21.0)             | 69 (22.3) | 5 (15.2) | 0.623   |
| Polycystic kidney disease, autosomal dominant (adult) form, n (%) | 111 (13.9)             | 37 (11.9) | 7 (21.2) | 0.298   |
| Pyelonephritis, n (%)                                             | 91 (11.4)              | 35 (11.3) | 4 (12.1) | 0.990   |
| Renal vascular disease, n (%)                                     | 81 (10.1)              | 26 (8.4)  | 3 (9.1)  | 0.671   |
| IgA nephropathy, n (%)                                            | 61 (7.6)               | 26 (8.4)  | 2 (6.1)  | 0.853   |
| Diabetes type I and II, n (%)                                     | 33 (4.1)               | 14 (4.5)  | 0 (0.0)  | 0.462   |

Digits 0-2 designate number of the rs12917707 minor allele copies per genotype

**Table S2.** Predictors of GF (univariate Cox regression analysis) in 1066 renal transplant recipients followed up for a median [IQR] 5.5 [2.9-8.8] years after transplantation

|                                  | HR   | 95% CI    | <i>P</i> value |
|----------------------------------|------|-----------|----------------|
| Recipient age at transplantation | 0.99 | 0.98-1.00 | 0.037          |
| Recipient sex: male              | 1.11 | 0.82-1.51 | 0.495          |
| Donor age                        | 1.02 | 1.01-1.03 | 0.002          |
| Donor sex: male                  | 0.98 | 0.73-1.33 | 0.907          |
| Donor type: living vs deceased   | 0.54 | 0.35-0.84 | 0.006          |
| Cold ischemia time               | 1.03 | 1.01-1.04 | 0.001          |
| Total warm ischemia time         | 1.02 | 1.01-1.03 | 0.001          |
| Delayed graft function           | 3.83 | 2.83-5.19 | <0.001         |
| Acute rejection episodes history | 1.87 | 1.38-2.52 | <0.001         |

HR, hazard ratio; CI, confidence intervals.

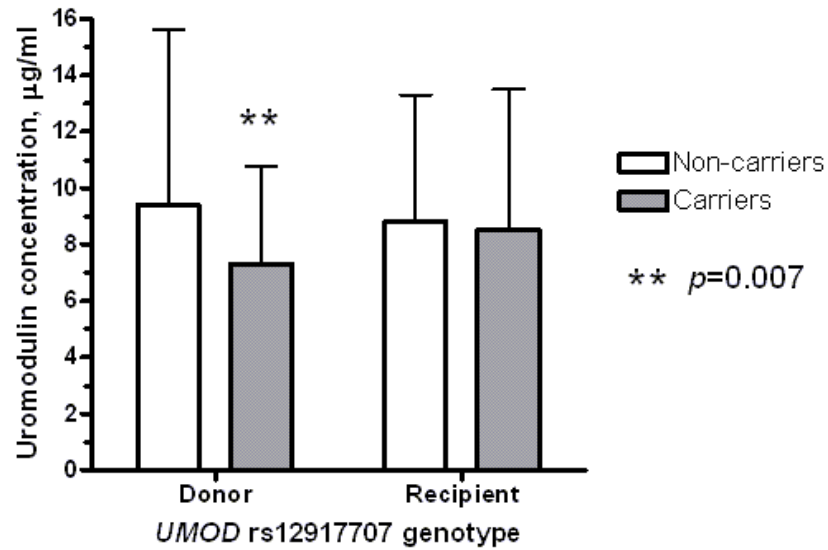

**Figure S1.** Uromodulin urinary concentration in 282 renal transplant recipients at 4.2 [2.2-6.1] yrs post-transplant by donor and recipient genotype stratified by presence (carriers) or absence (non-carriers) of *UMOD* rs12917707 minor allele. Columns represent respective medians of values, error bars – interquartile range.  $P=0.007$ , Mann-Whitney U-test.
